# Supplementary material
Source: PubMed Central journal article supplement (PMC11154876)
Supplement: VETMED-67-10-122026-s001.pdf [file VETMED-67-10-122026-s001.pdf]

<https://doi.org/10.17221/4/2023-VETMED>

## Corrigendum

To the published article: Knizatova N, Massanyi M, Rossi R, Ondruska L, Kovacik A, Tokarova K, Gren A, Formicki G, Binkowski L, Halo M, Lukac N, Massanyi P, Vizzarri F (2022): **The effect of brown seaweed and polyphenol supplementation in male rabbits on the blood profile and antioxidant markers.** *Vet Med-Czech* 67, 527–537 (doi: 10.17221/26/2022-VETMED).

Corrected were the sources of funding, page: 527.

The authors apologise for any inconvenience that it may have caused.

Original title page data:

“Supported by VEGA 1/0539/18; VEGA 1/0392/20, APVV-16-0289; Operational program – Integrated Infrastructure within the project: Demand-driven research for the sustainable and innovative food, Drive4SIFood 313011V336; co-financed by the European Regional Development Fund.”

Corrected title page data:

“Supported by the Slovak Research and Development Agency under the contracts no. APVV-16-0289 and no. APVV-21-0168. This publication was also supported by VEGA 1/0392/20, VEGA 1/0698/22 and by the Operational program - Integrated Infrastructure within the project: Demand-driven research for the sustainable and innovative food, Drive4SIFood 313011V336, co-financed by the European Regional Development Fund.”

Corresponding author:

Ing. Martin Massanyi, PhD.

[martinmassanyi@yahoo.com](mailto:martinmassanyi@yahoo.com)
